# Supplementary material for: Clinical Outcomes after Bilateral Implantation of Trifocal Diffractive Intraocular Lenses and Extended Depth of Focus Intraocular Lenses
Source: MDPI journal article supplement (doi:10.3390/jcm11195729), 2022-09-27
Supplement: s1 [file s1]

**Table S2.** The mean and standard deviation of contrast sensitivity under photopic condition, mesopic condition without glare, and mesopic condition with glare at postoperative 3 months.

| <b>Photopic condition</b>              | <b>3cpd</b> | <b>6cpd</b> | <b>12cpd</b> | <b>18cpd</b> |
|----------------------------------------|-------------|-------------|--------------|--------------|
| <b>PanOptix</b>                        | 1.75 ± 0.06 | 1.95 ± 0.14 | 1.57 ± 0.15  | 1.03 ± 0.21  |
| <b>FineVision</b>                      | 1.79 ± 0.08 | 1.97 ± 0.21 | 1.67 ± 0.23  | 1.14 ± 0.18  |
| <b>Symfony</b>                         | 1.69 ± 0.16 | 1.91 ± 0.16 | 1.65 ± 0.18  | 1.10 ± 0.19  |
| <b>MiniWell</b>                        | 1.76 ± 0.10 | 1.96 ± 0.19 | 1.73 ± 0.25  | 1.12 ± 0.20  |
|                                        |             |             |              |              |
| <b>Mesopic condition without glare</b> | <b>3cpd</b> | <b>6cpd</b> | <b>12cpd</b> | <b>18cpd</b> |
| <b>PanOptix</b>                        | 1.49 ± 0.18 | 1.55 ± 0.24 | 1.08 ± 0.36  | 0.64 ± 0.32  |
| <b>FineVision</b>                      | 1.60 ± 0.18 | 1.49 ± 0.18 | 1.07 ± 0.33  | 0.54 ± 0.25  |
| <b>Symfony</b>                         | 1.49 ± 0.20 | 1.41 ± 0.37 | 0.93 ± 0.29  | 0.44 ± 0.28  |
| <b>MiniWell</b>                        | 1.51 ± 0.14 | 1.60 ± 0.21 | 1.20 ± 0.56  | 0.70 ± 0.44  |
|                                        |             |             |              |              |
| <b>Mesopic condition with glare</b>    | <b>3cpd</b> | <b>6cpd</b> | <b>12cpd</b> | <b>18cpd</b> |
| <b>PanOptix</b>                        | 1.69 ± 0.08 | 1.89 ± 0.20 | 1.43 ± 0.24  | 1.00 ± 0.21  |
| <b>FineVision</b>                      | 1.67 ± 0.14 | 1.78 ± 0.15 | 1.49 ± 0.17  | 0.95 ± 0.27  |
| <b>Symfony</b>                         | 1.60 ± 0.20 | 1.76 ± 0.19 | 1.43 ± 0.31  | 0.93 ± 0.27  |
| <b>MiniWell</b>                        | 1.73 ± 0.15 | 1.88 ± 0.22 | 1.56 ± 0.31  | 1.04 ± 0.26  |

cpd=cycle per degree
