# Supplementary material for: Clinical Outcomes after Bilateral Implantation of Trifocal Diffractive Intraocular Lenses and Extended Depth of Focus Intraocular Lenses
Source: MDPI journal article supplement (doi:10.3390/jcm11195729), 2022-09-27
Supplement: s1 [file s1]

**Table S1.** The mean and standard deviation of corrected binocular visual acuity measured for defocus curve at postoperative 3 months.

| <b>Diopter</b>    | <b>+2.0</b>  | <b>+1.5</b>  | <b>+1.0</b>  | <b>+0.5</b>  |
|-------------------|--------------|--------------|--------------|--------------|
| <b>PanOptix</b>   | 0.42 ± 0.11  | 0.27 ± 0.15  | 0.12 ± 0.13  | -0.02 ± 0.13 |
| <b>FineVision</b> | 0.15 ± 0.15  | 0.07 ± 0.11  | -0.02 ± 0.09 | -0.07 ± 0.11 |
| <b>Symfony</b>    | 0.31 ± 0.23  | 0.17 ± 0.20  | 0.06 ± 0.15  | -0.05 ± 0.08 |
| <b>MiniWell</b>   | 0.13 ± 0.19  | 0.05 ± 0.16  | 0.00 ± 0.15  | -0.05 ± 0.07 |
|                   |              |              |              |              |
| <b>Diopter</b>    | <b>0.0</b>   | <b>-0.5</b>  | <b>-1.0</b>  | <b>-1.5</b>  |
| <b>PanOptix</b>   | -0.11 ± 0.09 | -0.02 ± 0.09 | 0.00 ± 0.13  | -0.06 ± 0.12 |
| <b>FineVision</b> | -0.09 ± 0.10 | -0.05 ± 0.10 | 0.00 ± 0.11  | -0.01 ± 0.11 |
| <b>Symfony</b>    | -0.10 ± 0.07 | -0.11 ± 0.09 | -0.06 ± 0.12 | -0.01 ± 0.13 |
| <b>MiniWell</b>   | -0.09 ± 0.07 | -0.09 ± 0.06 | -0.06 ± 0.07 | -0.07 ± 0.07 |
|                   |              |              |              |              |
| <b>Diopter</b>    | <b>-2.0</b>  | <b>-2.5</b>  | <b>-3.0</b>  | <b>-3.5</b>  |
| <b>PanOptix</b>   | -0.04 ± 0.10 | 0.02 ± 0.09  | 0.14 ± 0.13  | 0.24 ± 0.16  |
| <b>FineVision</b> | -0.05 ± 0.11 | 0.00 ± 0.12  | 0.09 ± 0.11  | 0.24 ± 0.14  |
| <b>Symfony</b>    | 0.02 ± 0.12  | 0.11 ± 0.11  | 0.25 ± 0.14  | 0.38 ± 0.15  |
| <b>MiniWell</b>   | -0.02 ± 0.08 | 0.05 ± 0.10  | 0.12 ± 0.11  | 0.26 ± 0.14  |
