# Supplementary material for: Clinical Outcomes after Bilateral Implantation of Trifocal Diffractive Intraocular Lenses and Extended Depth of Focus Intraocular Lenses
Source: MDPI journal article supplement (doi:10.3390/jcm11195729), 2022-09-27
Supplement: s1 [file s1]

**Table S3.** The power analyses for analysis of variance performed.

| <b>Parameters analyzed</b>                      | <b>Effect size</b> | <b>Power</b> |
|-------------------------------------------------|--------------------|--------------|
| <b>Visual outcome</b>                           |                    |              |
| – Best corrected visual acuity                  | 0.205              | 0.221        |
| – Uncorrected distant visual acuity             | 0.204              | 0.218        |
| – Uncorrected intermediate (80cm) visual acuity | 0.139              | 0.121        |
| – Uncorrected intermediate (60cm) visual acuity | 0.398              | 0.703        |
| – Uncorrected near (40cm) visual acuity         | 0.581              | 0.967        |
| <b>Refractive Outcome</b>                       |                    |              |
| – Postoperative spherical equivalent            | 0.551              | 0.992        |
| – Postoperative refractive cylinder             | 0.161              | 0.199        |
| – Absolute prediction error by SRK-T            | 0.171              | 0.208        |
| – Absolute prediction error by Haigis           | 0.164              | 0.194        |
| – Absolute prediction error by Barrett II       | 0.251              | 0.419        |
| <b>Contrast sensitivity</b>                     |                    |              |
| – Photopic, 3 cycle per degree                  | 0.350              | 0.499        |
| – Photopic, 6 cycle per degree                  | 0.137              | 0.107        |
| – Photopic, 12 cycle per degree                 | 0.260              | 0.289        |
| – Photopic, 18 cycle per degree                 | 0.201              | 0.184        |
| – Mesopic without glare, 3 cycle per degree     | 0.271              | 0.256        |
| – Mesopic without glare, 6 cycle per degree     | 0.251              | 0.224        |
| – Mesopic without glare, 12 cycle per degree    | 0.266              | 0.249        |
| – Mesopic without glare, 18 cycle per degree    | 0.303              | 0.315        |
| – Mesopic with glare, 3 cycle per degree        | 0.276              | 0.323        |
| – Mesopic with glare, 6 cycle per degree        | 0.297              | 0.371        |
| – Mesopic with glare, 12 cycle per degree       | 0.189              | 0.167        |
| – Mesopic with glare, 18 cycle per degree       | 0.150              | 0.120        |
| <b>High order aberration</b>                    |                    |              |
| – High order aberration                         | 0.103              | 0.092        |
| – Coma                                          | 0.200              | 0.232        |
| – Trefoil                                       | 0.096              | 0.086        |
| – Spherical aberration (z12)                    | 0.610              | 0.989        |
| <b>Quality of vision</b>                        |                    |              |
| – Glare                                         | 0.516              | 0.871        |
| – Halo                                          | 0.557              | 0.921        |
| – Starburst                                     | 0.408              | 0.664        |
| – Hazy vision                                   | 0.146              | 0.119        |
| – Blurring                                      | 0.217              | 0.218        |
| <b>Spectacle Independence</b>                   |                    |              |

|                     |       |       |
|---------------------|-------|-------|
| – Near              | 0.503 | 0.882 |
| – Intermediate      | 0.243 | 0.286 |
| – Far               | 0.115 | 0.095 |
| <b>Satisfaction</b> |       |       |
| – Near              | 0.217 | 0.225 |
| – Intermediate      | 0.124 | 0.100 |
| – Far               | 0.347 | 0.528 |
